# Supplementary material for: IDLDA: An Improved Diffusion Model for Predicting LncRNA–Disease Associations
Source: Front Genet. 2019 Dec 6;10:1259. doi: 10.3389/fgene.2019.01259 (PMC6909379; doi:10.3389/fgene.2019.01259)
Supplement: Supplementary Table 4 — List_of_lncRNA_disease_associations_of_Lnc2Cancer. [file Table_4.xlsx]

## Sheet: Sheet1
116HG	Prader-Willi Syndrome
1B FGF-antisense transcripts	Endometriosis
4930503E24Rik	Ischemia/Reperfusion
51A	Alzheimer'S Disease
5730458M16Rik	Heart Failure
7SK	Aids
7SK	Cancer
7SK	Cardiac Hypertrophy
7SK	Gastric Cancer
7SL	Aids
7SL	Dermatomyositis
7SL	Leishmania
7SL	Polymyositis
A130040M12Rik	Cancer
AC002511.1	Enterovirus 72 Infection
ACTA2-AS1	Lung Adenocarcinoma
ADAMTS9-AS2	Glioma
AF086415	Nasopharyngeal Carcinoma
AFAP1-AS1	Barrett'S Esophagus
AIR	Alcoholic Liver Disease
AIR	Chronic Nonalcoholic Liver Disease
AIR	Hepatocelluar Carcinoma
AK023948	Papillary Thyroid Carcinoma
AK028007	Ischemia/Reperfusion
AK038798	Heart Failure
AK042766	Restless Legs Syndrome
AK044955	Heart Failure
AK049728	Heart Failure
AK056098	Nasopharyngeal Carcinoma
AK095147	Nasopharyngeal Carcinoma
AK137898	Heart Failure
AK139328	Ischemia/Reperfusion
AK143260	Cardiac Lineage
AK143294	Ischemia/Reperfusion
AK143693	Ischemia/Reperfusion
AK144081	Heart Failure
AK153778	Heart Failure
AK294004	Nasopharyngeal Carcinoma
Alg2	Ischemia/Reperfusion
Alu lncRNAs	Macular Degeneration
ANRIL	Atherosclerosis
ANRIL	Cancer
ANRIL	Periodontitis
ANRIL	Prostat
anti-NOS2A	Glioblastoma
anti-NOS2A	Meningioma
AP000688.29	Enterovirus 71 Infection
AP5M1	Nasopharyngeal Carcinoma
ASFMR1	Fragile X Syndrome
ATP6V1G2-DDX39B	Dilated Cardiomyopathy
ATP6V1G2-DDX39B	Hcv
ATXN8OS	Human Spinocerebellar Ataxia Type 8
ATXN8OS	Spinocerebellar Ataxia Type 8
B1 SINE RNA	Brain Ischemia
B1 SINE RNA	Infection Of Mouse Minute Virus
B2 SINE RNA	Deleterious Effects In The Somatic Thymus Tissue
B2 SINE RNA	Infection Of Chicken Embryo Lethal Orphan Adenovirus
B2 SINE RNA	Infection Of Mouse Minute Virus
B2 SINE RNA	Pain
BACE1-AS	Alzheimer'S Disease
BACE1-AS	Inclusion Body Myositis
BANCR	Melanoma
BANCR	Non-Small Cell Lung Cancer
BC040587	Osteosarcoma
BCAR4	Breast Cancer
BCYRN1	Aging
BCYRN1	Alzheimer'S Disease
BCYRN1	Breast Cancer
BCYRN1	Cervical Cancer
BCYRN1	Lung Cancer
BCYRN1	Oesophagus Cancer
BCYRN1	Ovarian Cancer
BCYRN1	Parotid Cancer
BCYRN1	Tongue Cancer
BDNF-AS	Depression
BDNF-AS	Huntington'S Disease
BDNF-AS	Psychiatric Disease
BDNF-AS	Schizophrenia
BDNF-AS1	Obesity
BLACAT1	Bladder Cancer
BOK-AS1	Cancer
BOK-AS1	Testicular Cancer
BPESC1	Blepharophimosis Syndrome
BX118339	West Syndrome
C15orf2	Angelman Syndrome
C15orf2	Prader-Willi Syndrome
C1QTNF9B-AS1	Prostat
CASC2	Endometrial Cancer
CBR3-AS1	Carcinoma
CBR3-AS1	Prostat
CCAT1	Colorectal Cancer
CCAT1	Gastric Cancer
CCAT2	Ccat2
CCAT2	Non-Small Cell Lung Cancer
CCDC26	Glioma
CCND1	Tumor
CCND1 promoter-derived lncRNAs	Tls-Associated Pathological States
CDKN2B-AS1	Abdominal Aortic Aneurysm
CDKN2B-AS1	Acute Lymphoblastic Leukemia
CDKN2B-AS1	Alzheimer'S Disease
CDKN2B-AS1	Aortic Aneurysm
CDKN2B-AS1	Atherosclerosis
CDKN2B-AS1	Basal Cell Carcinoma
CDKN2B-AS1	Breast Cancer
CDKN2B-AS1	Cancer
CDKN2B-AS1	Cardiovascular Disease
CDKN2B-AS1	Coronary Artery Disease
CDKN2B-AS1	Coronary Disease
CDKN2B-AS1	Coronary Heart Disease
CDKN2B-AS1	Diabetes
CDKN2B-AS1	Endometriosis
CDKN2B-AS1	Esophageal Squamous Cell Cancer
CDKN2B-AS1	Familial And Sporadic Intracranial Aneurysms
CDKN2B-AS1	Frailty
CDKN2B-AS1	Gastric Cancer
CDKN2B-AS1	Glaucoma
CDKN2B-AS1	Glioma
CDKN2B-AS1	Hereditary Cutaneous Malignant Melanoma
CDKN2B-AS1	Intracranial Aneurism
CDKN2B-AS1	Ischemic Stroke
CDKN2B-AS1	Leukemia
CDKN2B-AS1	Melanoma
CDKN2B-AS1	Myocardial Infarction
CDKN2B-AS1	Nasopharyngeal Carcinoma
CDKN2B-AS1	Neural System Tumors Syndrome
CDKN2B-AS1	Neurofibromatosis Type 1
CDKN2B-AS1	Periodontitis
CDKN2B-AS1	Peripheral Artery Disease
CDKN2B-AS1	Plexiform Neurofibroma
CDKN2B-AS1	Prostat
CDKN2B-AS1	Stroke
CDKN2B-AS1	Tumor
CDKN2B-AS1	Type 2 Diabetes
CDKN2B-AS10	Stroke
CDKN2B-AS11	Stroke
CDKN2B-AS12	Glioma
CDKN2B-AS13	Plexiform Neurofibroma
CDKN2B-AS2	Coronary Heart Disease
CDKN2B-AS3	Intracranial Aneurism
CDKN2B-AS4	Cancer
CDKN2B-AS5	Type 2 Diabetes
CDKN2B-AS6	Neuroblastoma
CDKN2B-AS7	Acute Lymphoblastic Leukemia
CDKN2B-AS8	Melanoma
CDKN2B-AS9	Prostat
CECR3	Cat Eye Syndrome
CECR9	Cat Eye Syndrome
CHL1-AS2	Adolescent Idiopathic Scoliosis
CHRF	Cardiac Hypertrophy
CRNDE	Colorectal Cancer
CTBP1-AS	Prostat
D4Z4	Facioscapulohumeral Muscular Dystrophy
DANCR	Bone Diseases
DAOA-AS1	Bipolar Disorder
DAOA-AS1	Panic Disorder
DAOA-AS1	Schizophrenia
DAPK1	Pancreatic Ductal Adenocarcinoma
DBE-T	Facioscapulohumeral Muscular Dystrophy
DGCR5	Digeorge Syndrome
DGCR5	Huntington'S Disease
DGCR5	Velocardiofacial Syndrome
DISC2	Affective Disorders
DISC2	Autism Spectrum Disorder
DISC2	Bipolar Disorder
DISC2	Depression
DISC2	Major Depression
DISC2	Schizophrenia
DLEU1	Chronic Lymphocytic Leukemia
DLEU2	Chronic Lymphocytic Leukemia
DLEU2	Lymphocytic Leukemia
DLEU2	Lymphoma
DLEU2	Myeloma
DLG2AS	Schizophrenia
DLX6-AS1	Split Hand/Split Foot Malformation Disorder
DMPK	Myotonic Dystrophy Type 1
DMPK 3'UTR	Heart Failure
DNM3OS	Ovarian Cancer
DQ786243	Crohn'S Disease
Dreh	Hepatocelluar Carcinoma
DSCAM-AS1	Adolescent Idiopathic Scoliosis
DSCAM-AS1	Breast Cancer
ENSG00000135253.9	Hereditary Haemorrhagic Telangiectasia
ENSG00000147753.5	Hereditary Haemorrhagic Telangiectasia
ENSG00000196096.3	Hereditary Haemorrhagic Telangiectasia
ENSG00000197251.3	Hereditary Haemorrhagic Telangiectasia
ENSG00000203325.3	Hereditary Haemorrhagic Telangiectasia
ENSG00000206129.3	Hereditary Haemorrhagic Telangiectasia
ENSG00000215231.3	Hereditary Haemorrhagic Telangiectasia
ENSG00000215374.4	Hereditary Haemorrhagic Telangiectasia
ENSG00000215808.2	Hereditary Haemorrhagic Telangiectasia
ENSG00000226496.1	Hereditary Haemorrhagic Telangiectasia
ENSG00000229563.1	Hereditary Haemorrhagic Telangiectasia
ENSG00000230133.1	Hereditary Haemorrhagic Telangiectasia
ENSG00000230544.1	Hereditary Haemorrhagic Telangiectasia
ENSG00000231133.1	Hereditary Haemorrhagic Telangiectasia
ENSG00000231185.2	Hereditary Haemorrhagic Telangiectasia
ENSG00000232021.2	Hereditary Haemorrhagic Telangiectasia
ENSG00000232046.1	Hereditary Haemorrhagic Telangiectasia
ENSG00000232956.3	Hereditary Haemorrhagic Telangiectasia
ENSG00000233154.1	Hereditary Haemorrhagic Telangiectasia
ENSG00000233251.3	Hereditary Haemorrhagic Telangiectasia
ENSG00000235285.1	Hereditary Haemorrhagic Telangiectasia
ENSG00000237036.3	Hereditary Haemorrhagic Telangiectasia
ENSG00000237548.1	Hereditary Haemorrhagic Telangiectasia
ENSG00000240453.1	Hereditary Haemorrhagic Telangiectasia
ENSG00000241269.1	Hereditary Haemorrhagic Telangiectasia
ENSG00000245910.3	Hereditary Haemorrhagic Telangiectasia
ENSG00000248176.1	Hereditary Haemorrhagic Telangiectasia
ENSG00000249364.1	Hereditary Haemorrhagic Telangiectasia
ENSG00000249772.1	Hereditary Haemorrhagic Telangiectasia
ENSG00000250195.1	Hereditary Haemorrhagic Telangiectasia
ENSG00000250608.1	Hereditary Haemorrhagic Telangiectasia
ENSG00000254154.3	Hereditary Haemorrhagic Telangiectasia
ENSG00000255471.1	Hereditary Haemorrhagic Telangiectasia
ENSG00000256218.1	Hereditary Haemorrhagic Telangiectasia
ENSG00000259150.1	Hereditary Haemorrhagic Telangiectasia
ENSG00000259334.1	Hereditary Haemorrhagic Telangiectasia
ENSG00000259484.1	Hereditary Haemorrhagic Telangiectasia
ENSG00000259758.1	Hereditary Haemorrhagic Telangiectasia
ENSG00000263753.1	Hereditary Haemorrhagic Telangiectasia
ENSG00000264772.1	Hereditary Haemorrhagic Telangiectasia
ENSG00000266952.1	Hereditary Haemorrhagic Telangiectasia
ENSMUST00000022467	Heart Failure
ENSMUST00000041159	Heart Failure
ENSMUST00000117372	Heart Failure
ENSMUST00000117393	Heart Failure
ENSMUST00000119855	Heart Failure
ENSMUST00000120925	Heart Failure
ENSMUST00000127230	Heart Failure
ENSMUST00000127429	Heart Failure
ENSMUST00000130025	Heart Failure
ENSMUST00000142855	Heart Failure
ENSMUST00000143888	Heart Failure
ENSMUST00000151138	Ischemia/Reperfusion
ENSMUST00000160947	Heart Failure
ENSMUST00000167632	Heart Failure
ENST00000513542	Ventricular Septal Defects
EPB41L4A-AS1	Cancer
ESCCAL-1	Esophageal Squamous Cell Cancer
ESCCAL-5	Esophageal Squamous Cell Cancer
ESRG	Embryonal Carcinoma
ESRG	Intracranial Aneurism
FADS1	Lipid Metabolism Disorder
Fendrr	Heart Failure
FGF10-AS1	Ventricular Septal Defects
FMR4	Fragile X Syndrome
FMR4	Fragile X-Associated Tremor And Ataxia Syndrome
FMR5	Fragile X Syndrome
FMR5	Fragile X-Associated Tremor And Ataxia Syndrome
FMR6	Fragile X Syndrome
FMR6	Fragile X-Associated Tremor And Ataxia Syndrome
GAS5	Autoimmune Disease
GAS5	B-Cell Neoplasms
GAS5	Breast Cancer
GAS5	Cancer
GAS5	Kidney Cancer
GAS5	Lymphoma
GAS5	Melanoma
GAS5	Prostat
GAS5	Systemic Lupus Erythaematosus
GAS5	Tumor
GDNFOS	Alzheimer'S Disease
GHET1	Gastric Cancer
Gm12839	Heart Failure
Gm20748	Cardiovascular Disease
Gm6644	Heart Failure
GNAS-AS1	Pseudohypoparathyroidism Type Ib
H19	Adrenocortical Carcinomas
H19	Atherosclerosis
H19	Beckwith-Wiedemann Syndrome
H19	Biparental Complete Hydatidiform Moles
H19	Bladder Cancer
H19	Breast Cancer
H19	Cancer
H19	Cervical Cancer
H19	Choricarcinoma
H19	Chronic Myeloproliferative Disorders
H19	Colon Cancer
H19	Congenital Hyperinsulinism
H19	Esophageal Squamous Cell Cancer
H19	Gastric Cancer
H19	Germ Cell Tumor
H19	Gestational Choriocarcinoma
H19	Gestational Trophoblastic Diseases
H19	Glioblastoma
H19	Glioma
H19	Growth Restriction
H19	Hematopoiesis
H19	Hepatocelluar Carcinoma
H19	Hyperhomocysteinemia
H19	Infertility
H19	Kidney Cancer
H19	Liver Cancer
H19	Lung Cancer
H19	Marek'S Disease
H19	Medulloblastoma
H19	Melanoma
H19	Meningioma
H19	Mullerian Aplasia
H19	Myeloproliferative Polycythaemia Vera
H19	Neural Tube Defects
H19	Neuroblastoma
H19	Obesity
H19	Ovarian Cancer
H19	Pheochromocytoma
H19	Pituitary Adenoma
H19	Prader-Willi Syndrome
H19	Pre-Eclampsia
H19	Prostat
H19	Silver-Russell Syndrome
H19	Trophoblastic Tumor
H19	Tumor
H19	Wiedemann-Beckwith Syndrome
H19	Wilms' Tumor
HAR1A	Alzheimer'S Disease
HAR1A	Huntington'S Disease
HAR1A	Schizophrenia
HAR1B	Alzheimer'S Disease
HAR1B	Huntington'S Disease
HAR1B	Schizophrenia
HCP5	Aids
HEIH	Hepatocelluar Carcinoma
HELLPAR	Extravillous Trophoblast
HIF1A-AS1	Kidney Cancer
HIF1A-AS1	Renal Cancer
HIF1A-AS2	Kidney Cancer
HI-LNC25	Type 2 Diabetes
HLA-AS1	Aids
HLA-AS1	Liver Injury
HLA-AS1	Multiple Sclerosis
HLA-AS1	Psoriasis
HNF1A-AS1	Adenocarcinoma
HNF1A-AS1	Oesophageal Adenocarcinoma
HOTAIR	B-Cell Neoplasms
HOTAIR	Breast Cancer
HOTAIR	Cancer
HOTAIR	Cervical Cancer
HOTAIR	Colon Cancer
HOTAIR	Colorectal Cancer
HOTAIR	Endometrial Cancer
HOTAIR	Epithelial Ovarian Cancer
HOTAIR	Esophageal Squamous Cell Cancer
HOTAIR	Gastric Cancer
HOTAIR	Gastrointestinal Cancer
HOTAIR	Hepatocelluar Carcinoma
HOTAIR	Laryngeal Squamous Cell Carcinoma
HOTAIR	Liver Cancer
HOTAIR	Lung Adenocarcinoma
HOTAIR	Lung Cancer
HOTAIR	Nasopharyngeal Carcinoma
HOTAIR	Non-Small Cell Lung Cancer
HOTAIR	Oesophageal Squamous Cell Carcinoma
HOTAIR	Oral Squamous Cell Carcinoma
HOTAIR	Pancreas Cancer
HOTAIR	Rheumatoid Arthritis
HOTAIR	Small Cell Lung Cancer
HOTAIR	Tumor
HOTTIP	Hepatocelluar Carcinoma
HTTAS	Huntington'S Disease
HTTAS_v1	Huntington'S Disease
HULC	Hepatic Colorectal Metastasis
HULC	Hepatocelluar Carcinoma
HULC	Liver Cancer
HYMAI	Transient Neonatal Diabetes Mellitus
IFNG-AS1	Multiple Sclerosis
IGF2-AS	Hepatocelluar Carcinoma
IGF2-AS	Prostat
IGF2-AS	Type 1 Diabetes
IGF2-AS	Wilms' Tumor
IPW	Prader-Willi Syndrome
Kcna2 antisense RNA	Neuropathic Pain
KCNQ1DN	Aging
KCNQ1DN	Wilms' Tumor
KCNQ1OT1	Beckwith-Wiedemann Syndrome
KCNQ1OT1	Colorectal Cancer
KCNQ1OT1	Hepatocelluar Carcinoma
KCNQ1OT1	Kidney Cancer
KRAS1P	Cancer
KUCG1	Duchenne Muscular Dystrophy
LALR	Hepatocelluar Carcinoma
LDMAR	Photoperiod-Sensitive Male Sterility
LINC00032	Melanoma
LINC00162	Narcolepsy
LINC00271	Schizophrenia
LINC00271	Type 2 Diabetes
LINC00299	Intellectual And Developmental Disability
LINC00312	Nasopharyngeal Carcinoma
Linc00963	Prostat
LINC01262	Parkinson'S Disease
LINCMD1	Duchenne Muscular Dystrophy
LincRNA-p21	Lung Cancer
LincRNA-p21	Colorectal Cancer
lincRNA-p21	P53-Associated Pathological States
LincRNA-p21	Tumor
LIPCAR	Heart Failure
lnc-AL355149.1-1	Nasopharyngeal Carcinoma
lnc-C22orf32-1	Nasopharyngeal Carcinoma
lncRNA-ATB	Hepatocelluar Carcinoma
LncRNA-LALR1	Liver Cancer
lncRNA-LET	Tumor
lncRNA-MVIH	Hepatocelluar Carcinoma
lncRNA-MVIH	Non-Small Cell Lung Cancer
lnc-ZNF674-1	Nasopharyngeal Carcinoma
LOC102635190	Heart Failure
LOC389023	Psychiatric Disease
Loc554202	Breast Cancer
LOC728606	Prostat
LSAMP-AS3	Osteosarcoma
LSINCT5	Breast Cancer
LSINCT5	Ovarian Cancer
MALAT1	B-Cell Neoplasms
MALAT1	Bladder Cancer
MALAT1	Breast Cancer
MALAT1	Cancer
MALAT1	Cervical Cancer
MALAT1	Colon Cancer
MALAT1	Colorectal Cancer
MALAT1	Decreased Myogenesis
MALAT1	Diabetes
MALAT1	Endometrial Cancer
MALAT1	Gallbladder Cancer
MALAT1	Hepatocelluar Carcinoma
MALAT1	Kidney Cancer
MALAT1	Laryngeal Squamous Cell Carcinoma
MALAT1	Liver Cancer
MALAT1	Lung Adenocarcinoma
MALAT1	Lung Cancer
MALAT1	Nasopharyngeal Carcinoma
MALAT1	Neuroblastoma
MALAT1	Non-Small Cell Lung Cancer
MALAT1	Osteosarcoma
MALAT1	Pancreas Cancer
MALAT1	Prostat
MALAT1	Small Cell Lung Cancer
MALAT1	Tdp-43-Associated Pathological States
MALAT1	Tumor
MALAT1	Uterus Cancer
MAP3K14	Pancreatic Ductal Adenocarcinoma
MEG3	Acute Myeloid Leukemia
MEG3	Bladder Cancer
MEG3	Breast Cancer
MEG3	Cancer
MEG3	Chronic Myeloid Leukemia
MEG3	Colon Cancer
MEG3	Gastric Cancer
MEG3	Glioma
MEG3	Hepatocelluar Carcinoma
MEG3	Heroin Abuse
MEG3	Huntington'S Disease
MEG3	Kidney Cancer
MEG3	Lung Cancer
MEG3	Meningioma
MEG3	Myelodysplastic Syndrome
MEG3	Neuroblastoma
MEG3	Nonfunctioning Pituitary Adenomas
MEG3	Pituitary Adenoma
MEG3	Prostat
MEG3	Tumor
MEG3	Type 1 Diabetes
MESTIT1	Silver-Russell Syndrome
MIAT	Cancer
MIAT	Drug Abuse
MIAT	Heroin Abuse
MIAT	Myocardial Infarction
MIAT	Schizophrenia
MINA	Esophageal Squamous Cell Cancer
MINA	Gastric Cancer
MINA	Hepatocelluar Carcinoma
MINA	Lung Cancer
MIR100HG	Myopia
MIR155HG	Chronic Lymphocytic Leukemia
MIR17HG	Cancer
MIR17HG	Lymphoma
MIR17HG	Syndromic Developmental Defect
MIR31HG	Breast Cancer
MIR7-3HG	Hepatocelluar Carcinoma
MKRN3-AS1	Prader-Willi Syndrome
MYCNOS	Neuroblastoma
NAMA	Papillary Thyroid Carcinoma
ncRAN	Neuroblastoma
NDM29	Neuroblastoma
NEAT-1	Aids
NEAT-1	Amyotrophic Lateral Sclerosis
NEAT-1	Frontotemporal Lobar Degeneration
NEAT-1	Huntington'S Disease
NEAT-1	Intrauterine Growth Restriction
NEAT-1	Tdp-43-Associated Pathological States
NEAT-1	Oral Squamous Cell Carcinoma
np_17856	Progressive Kidney Injury
np_5318	Progressive Kidney Injury
NPPA-AS1	Cardiovascular Disease
NPTN-IT1	Colorectal Cancer
NPTN-IT1	Hepatocelluar Carcinoma
NPTN-IT1	Squamous-Cell Lung Carcinomas
NRON	Down'S Syndrome
PAN	Kaposi'S Sarcoma
PANDA	P53-Associated Pathological States
PANDAR	Cancer
PCA3	Prostat
PCAT1	Cancer
PCAT1	Prostat
PCGEM1	Prostat
PCNA-AS1	Tumor
PCNCR1	Prostat
PDZRN3-AS1	Type 2 Diabetes
PINC	Breast Cancer
PINK1-AS	Glucose Metabolism Disorder
PINK1-AS	Parkinson'S Disease
PISRT1	Blepharophimosis Syndrome
PPP3CB	Pancreatic Ductal Adenocarcinoma
PRINS	Psoriasis
PRNCR1	Prostat
PSORS1C3	Psoriasis
PTCSC	Papillary Thyroid Carcinoma
PTCSC3	Papillary Thyroid Carcinoma
PTENP1	Cancer
PTENP1	Prostat
PTENP1	Tumor
PTENpg1	Tumor
PTHLH	Brachydactyly
PVT1	Breast Cancer
PVT1	Burkitt'S Lymphomas
PVT1	Cancer
PVT1	Cleft Lip
PVT1	Diabetic Nephropathy
PVT1	Hodgkin'S Lymphoma
PVT1	Lymphoma
PVT1	Murine Plasmacytomas
PVT1	Ovarian Cancer
PVT1	Pancreas Cancer
PVT1	Prostat
PVT1	Renal Cancer
PVT1	Type 1 Diabetes
PVT1	Type 2 Diabetes
REST/CoREST-regulated lncRNAs	Huntington'S Disease
RMST	Rhabdomyosarcoma
RNA polymerase III-dependent lncRNAs	Diffuse Cerebral Hypomyelination With Cerebellar Atrophy And Hypoplasia Of The Corpus Callosum
RNA-a	Opitz–Kaveggia Syndrome
RNase MRP	Cartilage Hair Hypoplaisia
RP1-179N16.3	Nasopharyngeal Carcinoma
RP4-620F22.3	Enterovirus 74 Infection
RP5-843L14.1	Enterovirus 73 Infection
RRP1B	Cancer
RUNXOR	Hematopoietic Malignancies
SCAANT1	Spinocerebellar Ataxia Type 7
Scarb2	Heart Failure
SCHLAP1	Prostat
Sema3g	Ischemia/Reperfusion
SLC7A2-IT1A/B	Progressive Encephalopathy With Severe Infantile Anorexia
SNHG11	Obesity
SNHG16	Bladder Cancer
SNHG16	Colorectal Cancer
SNHG3	Alzheimer'S Disease
SNHG4	Myelodysplastic Syndrome
SNHG5	Lymphoma
SOX2-OT	Esophageal Squamous Cell Cancer
SOX2-OT	Alzheimer'S Disease
SOX2-OT	Neurodevelopmental Syndromes Associated With The Sox2 Locus
Sox4	Ischemia/Reperfusion
SPRY4-IT1	Esophageal Squamous Cell Cancer
SPRY4-IT1	Melanoma
SRA1	Breast Cancer
SRA1	Cardiomyopathy
SRA1	Human Dilated Cardiomyopathy
SRA1	Ovarian Cancer
SRA1	Uterus Cancer
Srsf9	Ischemia/Reperfusion
SUMO1P3	Gastric Cancer
TC0100223	Cancer
TC0101441	Cancer
TC0101686	Cancer
TCL6	Leukemia
TCL6	Lymphoma
TDRG1	Testicular Cancer
TERC	Dyskeratosis Congenita
TERC	Prostat
TERRA	Cancer
THRIL	Kawasaki Disease
TINCR	Squamous Cell Carcinoma
TRAF3IP2-AS1	Schizophrenia
Trp53cor1	Cancer
Trp53cor1	Colorectal Cancer
Trp53cor1	Tumor
Trpm3	Heart Failure
T-UCRs	Neuroblastoma
TUG1	B-Cell Neoplasms
TUG1	Bladder Cancer
TUG1	Huntington'S Disease
TUG1	Non-Small Cell Lung Cancer
TUSC8	Cervical Cancer
U1 spliceosomal lncRNA	Parkinson'S Disease
Ube3a-as	Angelman Syndrome
UBE3A-AS1	Angelman Syndrome
UBE3A-AS1	Prader-Willi Syndrome
UBE3A-ATS	Angelman Syndrome
uc.115-	Heart Failure
uc.184+	Heart Failure
UCA1	Bladder Cancer
UCA1	Oral Squamous Cell Carcinoma
UCA1	Pancreaticobiliary Maljunction
UCA1	Squamous Carcinoma
UCA1	Tongue Squamous Cell Carcinomas
UCA1	Tumor
UCH1LAS	Parkinson'S Disease
VL30 LTRs	Hepatocelluar Carcinoma
WRAP53	Cancer
WRAP53	Dyskeratosis Congenita
WT1-AS	Acute Myeloid Leukemia
WT1-AS	Wilms' Tumor
Wt1os	Ischemia/Reperfusion
XIST	Bladder Cancer
XIST	Breast Cancer
XIST	Cancer
XIST	Female Cancers
XIST	Klinefelter'S Syndrome
XIST	Testicular Cancer
Yiya	Cancer
ZFAT-AS1	Autoimmune Disease
Zim3	Heart Failure
ZNFX1-AS1	Breast Cancer
ZNFX1-AS1	Ductal Carcinoma
PVT1	Gastric Cancer
LINC01133	Lung Squamous Cell Cancer
lnc-LCE5A-1	Head And Neck Squamous Cell Carcinoma
lnc-KCTD6-3	Head And Neck Squamous Cell Carcinoma
UCA1	Gastric Cancer
antisense to Uchl1 (AS Uchl1)	Parkinson'S Disease
SPRY4-IT1	Gastric Cancer
LOC728228	Lung Cancer
MALAT1	Glioblastoma
H19	Coronary Artery Disease
tumour suppressor candidate 7 (TUSC7)	Gastric Cancer
HIF1A-AS1	Cardiovascular Disease
UCA1	Hepatocellular Carcinoma
lncRNA-ATB	Colorectal Cancer
Arid2-IR	Renal Inflammation
TINCR	Gastric Cancer
NRON	Aids
MALAT2-activated long noncoding RNA	Gastric Cancer
DRAIC/PCAT29	Prostate Cancer, Bladder Cancer, Low-Grade Gliomas, Lung Adenocarcinoma, Stomach Adenocarcinoma, Renal Clear Cell Carcinoma, Hepatocellular Carcinoma, Skin Melanoma
DANCR	Postmenopausal Osteoporosis
MRAK052686	Nonalcoholic Fatty Liver Disease (Nafld)
Abhd11os	Neurodegenerative Diseases
MALAT1	Renal Cell Carcinoma (Rcc)
Androgen Receptor Coregulator CTBP1-AS	Polycystic Ovary Syndrome
long stress-induced non-coding transcript 5 (LSINCT5)	Gastric Cancer,Colorectal Cancer
NBAT-1	Neuroblastoma
prostate cancer gene expression marker 1 (PCGEM1)	Prostate Cancer
SChLAP1	Prostate Cancer
PCA3	Prostate Cancer
linc-POU3F3	Glioma
MALAT1	Multiple Myeloma
Neat1	Infertility
MALAT1	Diabetes Mellitus
ENST00000480739	Pancreatic Ductal Adenocarcinoma
lnc-SCA7	Spinocerebellar Ataxia Type 7 (Sca7)
HOST2	Epithelial Ovarian Cancer
GAPLINC	Gastric Cancer
RP5-833A20.1	Atherosclerosis
lincRNA-RoR	Triple-Negative Breast Cancer
AC006050.3-003	Lung Squamous Cell Carcinoma
LOC285194	Esophageal Squamous Cell Carcinoma (Escc)
AB074278	Bladder Cancer
Xist	Membranous Nephropathy (Mn)
lincRNA-p21	Atherosclerosis
cyclin-dependent kinase inhibitor 2B antisense RNA (CDKN2B-AS)	Endometriosis
wingless-type MMTV integration site family member 4 (WNT4)	Endometriosis
HOX transcript antisense RNA (HOTAIR)	Renal Carcinoma
Urothelial cancer associated 1 (UCA1)	Carcinoma Of The Urinary Bladder
HA117	Hirschsprung'S Disease
miR-21	Laryngeal Squamous Cell Carcinoma
TARID	Cancer
PVT1	Hepatocellular Carcinoma
hypoxia inducible factor 1A antisense RNA 2	Acute Myocardial Infarction
cyclin-dependent kinase inhibitor 2B antisense RNA 1 (ANRIL)	Acute Myocardial Infarction
member 1 opposite strand/antisense transcript 1 (KCNQ1OT1)	Acute Myocardial Infarction
metastasis-associated lung adenocarcinoma transcript 1	Acute Myocardial Infarction
myocardial infarction-associated transcript	Acute Myocardial Infarction
XLOC_004562	H. Pylori-Related Diseases
XLOC_005912	H. Pylori-Related Diseases
XLOC_000620	H. Pylori-Related Diseases
XLOC_004122	H. Pylori-Related Diseases
XLOC_014388	H. Pylori-Related Diseases
Asb3	Cardiovascular And Renal Disease
Chac2	Cardiovascular And Renal Disease
Pex11b	Cardiovascular And Renal Disease
Sp5	Cardiovascular And Renal Disease
91H	Colorectal Cancer
AA174084	Gastric Cancer
AATBC	Bladder Cancer
AB019562	Hypopharyngeal Squamous Cell Carcinoma
AB073614	Glioma
AB073614	Ovarian Cancer
AB074278	Urothelial Carcinoma Of The Bladder
AB209630	Hypopharyngeal Squamous Cell Carcinoma
ABHD11-AS1	Gastric Cancer
AC004166.7	Lung Adenocarcinoma
AC007403.1	Non-Small Cell Lung Cancer
AC013264.2	Non-Small Cell Lung Cancer
AC026166.2-001	Laryngeal Squamous Cell Carcinoma
AC079776.2	Lung Adenocarcinoma
AC090952.4.1	Non-Small Cell Lung Cancer
AC104699.1	Gastric Cancer
AC130710	Gastric Cancer
AC138128.1	Gastric Cancer
ADAMTS9-AS2	Non-Small Cell Lung Cancer
AF070632	Hepatocellular Carcinoma
AF075041	Pancreatic Cancer
AF116616	Osteosarcoma
AF118081	Lung Cancer
AF268386	Malignant Pleural Mesothelioma
AF339813	Pancreatic Cancer
AFAP1-AS1	Colorectal Cancer
AFAP1-AS1	Esophageal Adenocarcinoma
AFAP1-AS1	Hepatocellular Carcinoma
AFAP1-AS1	Lung Cancer
AFAP1-AS1	Nasopharyngeal Carcinoma
AFAP1-AS1	Non-Small Cell Lung Cancer
AFAP1-AS1	Pancreatic Ductal Adenocarcinoma
AGAP2-AS1	Non-Small Cell Lung Cancer
AI364715	Gastric Cancer
AK021443	Hepatocellular Carcinoma
AK022029	Pancreatic Cancer
AK022159	Pancreatic Cancer
AK022798	Gastric Cancer
AK022971	Gastric Cancer
AK024556	Prostate Cancer
AK027294	Colorectal Cancer
AK054908	Malignant Pleural Mesothelioma
AK055007	Hepatocellular Carcinoma
AK056988	Hepatocellular Carcinoma
AK057054	Gastric Cancer
AK058003	Gastric Cancer
AK093543	Hepatocellular Carcinoma
AK094838	Osteosarcoma
AK096725	Renal Cell Carcinoma
AK097500	Osteosarcoma
AK123072	Gastric Cancer
AK123263	Non-Small Cell Lung Cancer
AK123657	Colorectal Cancer
AK123790	Hepatocellular Carcinoma
AK126698	Non-Small Cell Lung Cancer
AK129685	Malignant Pleural Mesothelioma
AK130275	Malignant Pleural Mesothelioma
AK130977	Malignant Pleural Mesothelioma
AK311218	Non-Small Cell Lung Cancer
AKR7L	Gastric Cancer
AL365371	Osteosarcoma
AL389956	Pancreatic Cancer
ANRIL	Acute Lymphoblastic Leukemia
ANRIL	Acute Myeloid Leukemia
ANRIL	Bladder Cancer
ANRIL	Breast Cancer
ANRIL	Cervical Cancer
ANRIL	Colorectal Cancer
ANRIL	Esophageal Squamous Cell Carcinoma
ANRIL	Gallbladder Cancer
ANRIL	Gastric Cancer
ANRIL	Glioma
ANRIL	Hepatocellular Carcinoma
ANRIL	Laryngeal Squamous Cell Carcinoma
ANRIL	Melanoma
ANRIL	Neurofibromatosis Type 1
ANRIL	Non-Small Cell Lung Cancer
ANRIL	Osteosarcoma
ANRIL	Ovarian Cancer
ANRIL	Prostate Cancer
ANRIL	Serous Ovarian Cancer
AOC4P	Hepatocellular Carcinoma
AP000221.1	Pancreatic Cancer
AP001439.2	Gastric Cancer
AP001631.9	Gastric Cancer
APOC1P1-3	Breast Cancer
APTR	Glioblastoma
ASK00420	Cervical Cancer
ASLNC00339	Osteosarcoma
ASLNC04080	Endometrial Carcinoma
ASO1937	Astrocytoma
ATB	Glioma
ATB	Prostate Cancer
AX746718	Malignant Pleural Mesothelioma
AY129027	Hepatocellular Carcinoma
BACE1AS	Colon Cancer
BAIAP2-AS1	Hepatocellular Carcinoma
BALR-2	B Cell Acute Lymphoblastic Leukemia
BALR-2	B-Lymphoblastic Leukemia
BALR-6	B-Lymphoblastic Leukemia
BANCR	Colorectal Cancer
BANCR	Gastric Adenocarcinoma
BANCR	Gastric Cancer
BANCR	Lung Cancer
BANCR	Malignant Melanoma
BANCR	Osteosarcoma
BANCR	Papillary Thyroid Carcinoma
BANCR	Retinoblastoma
BC002350	Osteosarcoma
BC002811	Astrocytoma
BC008363	Pancreatic Ductal Adenocarcinoma
BC011663	Gastric Cancer
BC014579	Hepatocellular Carcinoma
BC017743	Hepatocellular Carcinoma
BC023629	Pancreatic Cancer
BC029135	Clear Cell Renal Cell Carcinoma
BC032469	Gastric Cancer
BC040587	Breast Cancer
BC040587	Gastric Cancer
BC047917	Renal Cell Carcinoma
BC050642	Osteosarcoma
BC070168	Renal Cell Carcinoma
BC091525	Osteosarcoma
BC200	Breast Cancer
BC200	Cervical Cancer
BC200	Esophageal Cancer
BC200	Esophageal Squamous Cell Carcinoma
BC200	Glioma
BC200	Lung Cancer
BC200	Ovarian Cancer
BC200	Parotid Cancer
BC200	Tongue Cancer
BE503655	Osteosarcoma
BM742401	Gastric Cancer
BOKAS	Esophageal Squamous Cell Carcinoma
BOKAS	Testicular Cancer
BX647187	Prostate Cancer
BX648207	Colorectal Cancer
BX648695	Malignant Pleural Mesothelioma
BX649059	Colorectal Cancer
C13orf25	Diffuse Large B-Cell Lymphoma
C1401f132	Non-Small Cell Lung Cancer
C14orf132	Hepatocellular Carcinoma
CACNAICAS3	Gastric Cancer
CADM1-AS1	Clear Cell Renal Cell Carcinoma
CAHM	Colorectal Cancer
CAI2	Neuroblastoma
CAR10	Non-Small Cell Lung Cancer
CASC15-S	Neuroblastoma
CASC2	Colorectal Cancer
CASC2	Glioma
CCAL	Colorectal Cancer
CCAT1	Acute Myeloid Leukemia
CCAT1	Breast Cancer
CCAT1	Colon Cancer
CCAT1	Gallbladder Cancer
CCAT1	Hepatocellular Carcinoma
CCAT1	Non-Small Cell Lung Cancer
CCAT1	Ovarian Cancer
CCAT1-L	Colorectal Cancer
CCAT2	Breast Cancer
CCAT2	Cervical Cancer
CCAT2	Colon Cancer
CCAT2	Colorectal Cancer
CCAT2	Esophageal Squamous Cell Carcinoma
CCAT2	Gastric Cancer
CCAT2	Hepatocellular Carcinoma
CCAT2	Oral Squamous Cell Carcinoma
CCAT2	Ovarian Cancer
CCAT3	Colorectal Cancer
CCAT4	Colorectal Cancer
CCAT6	Colorectal Cancer
CCAT7	Colorectal Cancer
CCAT8	Colorectal Cancer
CCDC26	Acute Myeloid Leukemia
CCHE1	Cervical Cancer
CES1P1-001	Non-Small Cell Lung Cancer
CPS1-IT1	Hepatocellular Carcinoma
CPS1-IT1	Intrahepatic Cholangiocarcinoma
CR613944	Hepatocellular Carcinoma
CR619813	Pancreatic Cancer
CRNDE	Glioma
CRNDE-h	Colorectal Cancer
CTA-134P22.2	Bladder Cancer
CTA-363E6.2	Lung Adenocarcinoma
CTB-167B5.2	Hepatocellular Carcinoma
CTB-89H12.4	Prostate Cancer
CTBP1-AS	Prostate Cancer
CTC-276P9.1	Bladder Cancer
CTC-338M12.5	Pancreatic Cancer
CTD903	Colorectal Cancer
D16366	Hepatocellular Carcinoma
DACOR1	Colon Cancer
DANCR	Colorectal Cancer
DANCR	Hepatocellular Carcinoma
DANCR	Prostate Cancer
DB077273	Gastric Cancer
DBH-AS1	Hepatocellular Carcinoma
DDX6P	Pancreatic Cancer
DILC	Liver Cancer
DKFZP434K028	Gastric Cancer
DLX6-AS1	Lung Adenocarcinoma
Dnm3os	Epithelial Ovarian Cancer
DQ192290	Gastric Cancer
DQ786243	Colorectal Cancer
DQ786243	Hepatocellular Carcinoma
DRAIC	Prostate Cancer
EF177379	Malignant Pleural Mesothelioma
EFNA3	Breast Cancer
EGFLAM-AS1	Gastric Cancer
EGFR-AS1	Hepatocellular Carcinoma
EGOT	Breast Cancer
EGOT	Prostate Cancer
ENST00000244906	Astrocytoma
ENST00000318333	Gastric Cardia Adenocarcinoma
ENST00000374520	Gastric Cardia Adenocarcinoma
ENST00000395084	Hepatocellular Carcinoma
ENST00000414223	Renal Cell Carcinoma
ENST00000420168	Cervical Cancer
ENST00000422362	Gastric Cardia Adenocarcinoma
ENST00000422494	Papillary Thyroid Carcinoma
ENST00000423539	Papillary Thyroid Carcinoma
ENST00000425295	Triple-Negative Breast Cancer
ENST00000426615	Papillary Thyroid Carcinoma
ENST00000427243	Papillary Thyroid Carcinoma
ENST00000430471	Colorectal Cancer
ENST00000434223	Lung Adenocarcinoma
ENST00000434223	Non-Small Cell Lung Cancer
ENST00000435885	Esophageal Squamous Cell Carcinoma
ENST00000436616	Astrocytoma
ENST00000442037	Lung Adenocarcinoma
ENST00000445734	Endometrial Carcinoma
ENST00000448093	Endometrial Carcinoma
ENST00000453068	Renal Cell Carcinoma
ENST00000455912	Gastric Cardia Adenocarcinoma
ENST00000456007	Gastric Cardia Adenocarcinoma
ENST00000456185	Gastric Cardia Adenocarcinoma
ENST00000456816	Clear Cell Renal Cell Carcinoma
ENST00000460164	Triple-Negative Breast Cancer
ENST00000468960	Colorectal Cancer
ENST00000501583	Hepatocellular Carcinoma
ENST00000502941	Endometrial Carcinoma
ENST00000503710	Endometrial Carcinoma
ENST00000503723	Papillary Thyroid Carcinoma
ENST00000503812	Cervical Cancer
ENST00000503938	Triple-Negative Breast Cancer
ENST00000507950	Renal Cell Carcinoma
ENST00000515275	Papillary Thyroid Carcinoma
ENST00000539009	Colorectal Cancer
ENST00000540136	Lung Adenocarcinoma
ENST00000544591	Colorectal Cancer
ENST00000545440	Astrocytoma
ENST00000547963	Esophageal Squamous Cell Carcinoma
ENST00000564977	Cervical Cancer
ENST00000570022	Papillary Thyroid Carcinoma
ENST00000575202	Colorectal Cancer
EPB41L4A-AS2	Breast Cancer
Epist	Esophageal Squamous Cell Carcinoma
ERICH1-AS1	Non-Small Cell Lung Cancer
ESCCAL-1	Esophageal Squamous Cell Carcinoma
ESCCAL-5	Esophageal Squamous Cell Carcinoma
EVI1	Hepatocellular Carcinoma
EWSAT1	Ewing Sarcoma
FENDRR	Gastric Cancer
FER1L4	Gastric Cancer
FGFR3-AS1	Osteosarcoma
FOXCUT	Basal-Like Breast Cancer
FOXCUT	Esophageal Squamous Cell Carcinoma
FOXCUT	Oral Squamous Cell Carcinoma
FR0257520	Prostate Cancer
FR0348383	Prostate Cancer
FRLnc1	Gastric Cancer
FTX	Colorectal Cancer
FTX	Hepatocellular Carcinoma
GADD45G	Pituitary Adenoma
GAPLINC	Colorectal Cancer
GAS5	Bladder Cancer
GAS5	Cervical Cancer
GAS5	Colorectal Cancer
GAS5	Endometrial Carcinoma
GAS5	Gastric Cancer
GAS5	Hepatocellular Carcinoma
GAS5	Lung Adenocarcinoma
GAS5	Malignant Pleural Mesothelioma
GAS5	Multiple Myeloma
GAS5	Non-Small Cell Lung Cancer
GAS5	Ovarian Cancer
GAS5	Pancreatic Cancer
GAS5	Prostate Cancer
GAS5	Renal Cell Carcinoma
GAS6-AS1	Non-Small Cell Lung Cancer
GClnc1	Gastric Cancer
GHET1	Bladder Cancer
GHET1	Colorectal Cancer
GHSROS	Non-Small Cell Lung Cancer
GLT1D1	Hepatocellular Carcinoma
GNAS-AS1	Non-Small Cell Lung Cancer
GS1-5L10.1	Gastric Cancer
GUCY1B2	Non-Small Cell Lung Cancer
H19	Chronic Myeloid Leukemia
H19	Colorectal Cancer
H19	Esophageal Cancer
H19	Esophageal Squamous Cell Carcinoma
H19	Gallbladder Cancer
H19	Gastric Cardia Adenocarcinoma
H19	Hepatocellular Carcinoma
H19	Laryngeal Squamous Cell Carcinoma
H19	Nasopharyngeal Carcinoma
H19	Non-Small Cell Lung Cancer
H19	Pancreatic Ductal Adenocarcinoma
H19	Prostate Cancer
H19	Thyroid Cancer
H19	Wilms Tumor
HEIH	Hepatocellular Carcinoma
HESRG	Embryonal Carcinoma
HIF1A-AS1	Non-Small Cell Lung Cancer
HIF1A-AS2	Bladder Cancer
HIF1A-AS2	Gastric Cancer
HIF1A-AS2	Renal Cancer
HIF2PUT	Osteosarcoma
HIV1230	Gastric Cancer
HMlincRNA717	Gastric Cancer
HMlincRNA717	Non-Small Cell Lung Cancer
HMlincRNA717	Pancreatic Cancer
HNF1A-AS1	Esophageal Adenocarcinoma
HNF1A-AS1	Esophageal Squamous Cell Carcinoma
HNF1A-AS1	Gastric Cancer
HNF1A-AS1	Hepatocellular Carcinoma
HNF1A-AS1	Lung Adenocarcinoma
HOST2	Ovarian Cancer
HOTAIR	Acute Myeloid Leukemia
HOTAIR	B Cell Lymphoma
HOTAIR	Bladder Cancer
HOTAIR	Endometrial Carcinoma
HOTAIR	Esophageal Squamous Cell Carcinoma
HOTAIR	Gallbladder Cancer
HOTAIR	Gastric Adenocarcinoma
HOTAIR	Gastric Cardia Adenocarcinoma
HOTAIR	Gastrointestinal Stromal Tumor
HOTAIR	Glioblastoma
HOTAIR	Glioma
HOTAIR	Head And Neck Squamous Cell Carcinoma
HOTAIR	Hepatocellular Carcinoma
HOTAIR	Melanoma
HOTAIR	Multiple Myeloma
HOTAIR	Non-Functioning Pituitary Adenoma
HOTAIR	Osteosarcoma
HOTAIR	Ovarian Cancer
HOTAIR	Pancreatic Cancer
HOTAIR	Papillary Thyroid Carcinoma
HOTAIR	Pituitary Adenoma
HOTAIR	Prostate Cancer
HOTAIR	Renal Cancer
HOTAIR	Renal Cell Carcinoma
HOTAIR	Sarcoma
HOTAIR	Serous Ovarian Cancer
HOTAIR	Small-Cell Lung Cancer
HOTAIR	Triple-Negative Breast Cancer
HOTAIRM1	Acute Promyelocytic Leukemia
HOTAIRM1	Colorectal Cancer
HOTAIRM1	Promyelocytic Leukemia
HOTTIP	Colorectal Cancer
HOTTIP	Gastric Cancer
HOTTIP	Hepatocellular Carcinoma
HOTTIP	Non-Small Cell Lung Cancer
HOTTIP	Osteosarcoma
HOTTIP	Pancreatic Cancer
HOTTIP	Prostate Cancer
HOTTIP	Tongue Squamous Cell Carcinoma
HOXA11-AS	Ovarian Cancer
HOXA13	Hepatocellular Carcinoma
HOXA-AS2	Gastric Cancer
HOXD-AS1	Bladder Cancer
HOXD-AS1	Neuroblastoma
HULC	Colorectal Cancer
HULC	Diffuse Large B-Cell Lymphoma
HULC	Gastric Cancer
HULC	Glioma
HULC	Hepatocellular Carcinoma
HULC	Hepatoma
HULC	Osteosarcoma
HULC	Pancreatic Cancer
HULC	Papillary Thyroid Carcinoma
HULC	Prostate Cancer
ICR	Hepatocellular Carcinoma
IGF2-AS	Hepatocellular Carcinoma
IGF2-AS	Liver Cancer
IGF2-AS	Wilms Tumor
INTS7	Gastric Cancer
IRAIN	Acute Myeloid Leukemia
IRAIN	Breast Cancer
KCNQ1DN	Wilms Tumor
KCNQ1OT1	Breast Cancer
KCNQ1OT1	Hepatocellular Carcinoma
KCNQ1OT1	Prostate Cancer
KIAA0125	Gallbladder Cancer
KRT18P55	Gastric Cancer
KRT19P3	Bladder Cancer
LCAL1	Lung Cancer
LEIGC	Gastric Cancer
LINC00152	Clear Cell Renal Cell Carcinoma
LINC00152	Gastric Cancer
LINC00152	Hepatocellular Carcinoma
LINC00152	Pancreatic Cancer
LINC00261	Gastric Cancer
LINC00261	Non-Small Cell Lung Cancer
LINC00261	Pancreatic Cancer
LINC00342	Non-Small Cell Lung Cancer
LINC00467	Neuroblastoma
LINC00473	Lung Cancer
LINC00515	Ovarian Cancer
LINC00617	Breast Cancer
LINC00628	Gastric Cancer
LINC00668	Gastric Cancer
LINC00673	Melanoma
LINC00673	Non-Small Cell Lung Cancer
LINC00673	Pancreatic Cancer
LINC00857	Lung Cancer
LINC00961	Ovarian Cancer
LINC00963	Prostate Cancer
LINC00974	Hepatocellular Carcinoma
LINC00982	Gastric Cancer
LINC01021	Colorectal Cancer
LINC01133	Lung Squamous Cell Carcinoma
LINC01207	Lung Adenocarcinoma
LINC01419	Hepatocellular Carcinoma
linc-CARS2-2	Ovarian Cancer
linc-CBR1-2	Lung Cancer
linc-ITGB1	Breast Cancer
linc-POU3F3	Esophageal Squamous Cell Carcinoma
Linc-POU3F3	Gastric Cancer
lincRNA-BC2	Breast Cancer
lincRNA-BC4	Breast Cancer
lincRNA-BC5	Breast Cancer
lincRNA-BC8	Breast Cancer
lincRNA-CALCA	Hepatocellular Carcinoma
lincRNA-p21	B Cell Lymphoma
lincRNA-p21	Burkitts Lymphoma
lincRNA-p21	Cervical Cancer
lincRNA-p21	Chronic Lymphocytic Leukemia
lincRNA-p21	Glioma
lincRNA-p21	Hepatocellular Carcinoma
lincRNA-p21	Prostate Cancer
lincRNA-TSPAN8	Hepatocellular Carcinoma
lincRNA-uc002yug.2	Esophageal Squamous Cell Carcinoma
lincRNA-ZNF532	Pancreatic Cancer
linc-ROR	Breast Cancer
linc-ROR	Colon Cancer
linc-ROR	Colorectal Cancer
linc-ROR	Gastric Cancer
linc-ROR	Hepatocellular Carcinoma
linc-ROR	Malignant Melanoma
linc-ROR	Nasopharyngeal Carcinoma
linc-TNFRSF19-1	Ovarian Cancer
linc-UBC1	Bladder Cancer
linc-UBC1	Gastric Cancer
linc-VLDLR	Hepatocellular Carcinoma
lin-RECK-3	Ovarian Cancer
Llme23	Melanoma
LNC00964-3	Colorectal Cancer
lnc34a	Colon Cancer
lnc-ACACA-1	Clear Cell Renal Cell Carcinoma
lnc-AF085935	Hepatocellular Carcinoma
lnc-AL355149.1-1	Tongue Squamous Cell Carcinoma
lnc-bc060912	Lung Cancer
lnc-BMP2-2	Clear Cell Renal Cell Carcinoma
lnc-CC3	Cervical Cancer
lnc-CPN2-1	Clear Cell Renal Cell Carcinoma
lnc-CYP4A22-2/3	Clear Cell Renal Cell Carcinoma
lnc-FOXG1-2	Clear Cell Renal Cell Carcinoma
lnc-FZD1-2	Clear Cell Renal Cell Carcinoma
lnc-ITPR2-3	Clear Cell Renal Cell Carcinoma
lnc-JPH1-7	Head And Neck Squamous Cell Carcinoma
lnc-KCMF1-2:1	Papillary Thyroid Carcinoma
lnc-KCTD6-3	Laryngeal Cancer
lnc-KCTD6-3	Pharyngeal Cancer
lnc-KCTD6-3	Tongue Cancer
lnc-LCE5A-1	Laryngeal Cancer
lnc-LCE5A-1	Pharyngeal Cancer
lnc-LCE5A-1	Tongue Cancer
lnc-LCP2-2	Clear Cell Renal Cell Carcinoma
lnc-LLPH-2:1	Papillary Thyroid Carcinoma
lnc-MBL2-4:3	Tongue Squamous Cell Carcinoma
lnc-PLA2R1-1:1	Papillary Thyroid Carcinoma
lnc-PPP2R4-5	Tongue Squamous Cell Carcinoma
lnc-PSD4-1:14	Papillary Thyroid Carcinoma
lncRNA-422	Colorectal Cancer
lncRNA-AK058803	Breast Cancer
LncRNA-AP001631.9	Gastric Cancer
lncRNA-ATB	Colon Cancer
lncRNA-ATB	Gastric Cancer
lncRNA-ATB	Hepatocellular Carcinoma
lncRNA-ATB	Pancreatic Cancer
lncRNA-BGL3	Chronic Myeloid Leukemia
lncRNA-DQ786227	Lung Cancer
lncRNA-Dreh	Hepatocellular Carcinoma
lncRNA-EBIC	Cervical Cancer
lncRNA-HIT	Breast Cancer
lncRNA-Hpvt1	Hepatocellular Carcinoma
lncRNA-JADE	Breast Cancer
lncRNA-LET	Cervical Cancer
lncRNA-LET	Colorectal Cancer
lncRNA-LET	Gallbladder Cancer
lncRNA-LET	Gastric Cancer
lncRNA-LET	Hepatocellular Carcinoma
lncRNA-LET	Lung Squamous Cell Carcinoma
lncRNA-LET	Nasopharyngeal Carcinoma
lncRNA-n336928	Bladder Cancer
lncRNA-UNMIBC	Bladder Cancer
lnc-RP3-368B9	Clear Cell Renal Cell Carcinoma
lnc-SGK1	Gastric Cancer
lnc-SLC30A4-1	Clear Cell Renal Cell Carcinoma
lnc-SPAM1-6	Clear Cell Renal Cell Carcinoma
lnc-SPRR2D-1	Tongue Squamous Cell Carcinoma
lncTCF7	Hepatocellular Carcinoma
lnc-TTC34-3	Clear Cell Renal Cell Carcinoma
lnc-uc003wbd	Hepatocellular Carcinoma
lncUSMycN	Neuroblastoma
lnc-ZNF180-2	Clear Cell Renal Cell Carcinoma
LOC100128881	Ovarian Cancer
LOC100130476	Esophageal Squamous Cell Carcinoma
LOC100130476	Gastric Cardia Adenocarcinoma
LOC100132354	Lung Adenocarcinoma
LOC100287225	Colorectal Cancer
LOC100287482	Prostate Cancer
LOC100292680	Ovarian Cancer
LOC100499405	Lung Adenocarcinoma
LOC100507661	Thyroid Cancer
LOC105369388	Hepatocellular Carcinoma
LOC149086	Hepatocellular Carcinoma
LOC150622	Gastric Cancer
LOC152578	Colorectal Cancer
LOC389641	Pancreatic Ductal Adenocarcinoma
LOC401317	Nasopharyngeal Carcinoma
LOC440905	Lung Adenocarcinoma
LOC440905	Non-Small Cell Lung Cancer
LOC554202	Colorectal Cancer
LOC554202	Gastric Cancer
LOC572558	Bladder Cancer
LSINCT1	Breast Cancer
LSINCT1	Lung Cancer
LSINCT10	Breast Cancer
LSINCT10	Lung Cancer
LSINCT11	Breast Cancer
LSINCT11	Lung Cancer
LSINCT12	Breast Cancer
LSINCT12	Lung Cancer
LSINCT2	Breast Cancer
LSINCT2	Lung Cancer
LSINCT3	Breast Cancer
LSINCT3	Lung Cancer
LSINCT4	Breast Cancer
LSINCT4	Lung Cancer
LSINCT5	Colorectal Cancer
LSINCT5	Gastric Cancer
LSINCT5	Lung Cancer
LSINCT6	Breast Cancer
LSINCT6	Lung Cancer
LSINCT7	Breast Cancer
LSINCT7	Lung Cancer
LSINCT8	Breast Cancer
LSINCT8	Lung Cancer
LSINCT9	Breast Cancer
LSINCT9	Lung Cancer
LUADT1	Lung Adenocarcinoma
LUCAT1	Ovarian Cancer
LUNAR1	T Cell Acute Lymphoblastic Leukemia
M14574	Gastric Cancer
M41	Breast Cancer
M59227	Gastric Cancer
MALAT1	Clear Cell Renal Cell Carcinoma
MALAT1	Endometrial Stromal Sarcoma
MALAT1	Esophageal Squamous Cell Carcinoma
MALAT1	Fibrosarcoma
MALAT1	Gastric Cancer
MALAT1	Glioma
MALAT1	Hepatocellular Carcinoma
MALAT1	Melanoma
MALAT1	Oral Squamous Cell Carcinoma
MALAT1	Ovarian Cancer
MALAT1	Pancreatic Cancer
MALAT1	Pancreatic Ductal Adenocarcinoma
MALAT1	Papillary Thyroid Carcinoma
MALAT1	Pituitary Adenoma
MALAT1	Plexiform Fibromyxoma
MALAT1	Prostate Cancer
MALAT1	Renal Cancer
MALAT1	Renal Cell Carcinoma
MALAT1	Tongue Squamous Cell Carcinoma
MALAT1	Triple-Negative Breast Cancer
MALAT1	Urothelial Carcinoma Of The Bladder
MALAT2	Gastric Cancer
MA-linc1	Lung Cancer
MA-linc1	Osteosarcoma
MDC1-AS	Bladder Cancer
MDC1-AS	Glioma
MEG3	Cervical Cancer
MEG3	Clear Cell Renal Cell Carcinoma
MEG3	Colorectal Cancer
MEG3	Epithelial Ovarian Cancer
MEG3	Gallbladder Cancer
MEG3	Hepatocellular Carcinoma
MEG3	Lung Adenocarcinoma
MEG3	Non-Functioning Pituitary Adenoma
MEG3	Non-Small Cell Lung Cancer
MEG3	Oral Squamous Cell Carcinoma
MEG3	Osteosarcoma
MEG3	Pancreatic Neuroendocrine Tumors
MEG3	Papillary Thyroid Carcinoma
MEG3	Phaeochromocytoma
MEG3	Prostate Cancer
MEG3	Tongue Squamous Cell Carcinoma
MEG3	Wilms Tumor
MINCR	Gallbladder Cancer
MIR100HG	Acute Megakaryoblastic Leukemia
MIR155HG	Glioma
MNX1-AS1	Colorectal Cancer
MNX1-AS1	Ovarian Cancer
MONC	Acute Megakaryoblastic Leukemia
MRUL	Gastric Cancer
MT1DP	Liver Cancer
MUDENG	Nasopharyngeal Carcinoma
MVIH	Breast Cancer
MVIH	Hepatocellular Carcinoma
MVIH	Non-Small Cell Lung Cancer
MYLK-AS1	Gastric Cancer
n335550	Papillary Thyroid Carcinoma
n340790	Papillary Thyroid Carcinoma
n386477	Papillary Thyroid Carcinoma
NAG7	Nasopharyngeal Carcinoma
NAG7	Non-Small Cell Lung Cancer
NBAT-1	Breast Cancer
NBAT-1	Clear Cell Renal Cell Carcinoma
nc886	Gastric Cancer
ncC11orf49	Renal Cell Carcinoma
ncHDAC5	Renal Cell Carcinoma
ncNRFR	Colorectal Cancer
ncRAB31	Renal Cell Carcinoma
ncRAN	Bladder Cancer
ncRAN	Colorectal Cancer
NCRMS	Rhabdomyosarcoma
NCRNA00173	Hepatocellular Carcinoma
NCRNA00210	Non-Small Cell Lung Cancer
ncRNA-CCND1	Cervical Cancer
ncRuPAR	Colorectal Cancer
ncRuPAR	Gastric Cancer
ncSRPK1	Renal Cell Carcinoma
NEAT1	Acute Promyelocytic Leukemia
NEAT1	Breast Cancer
NEAT1	Burkitts Lymphoma
NEAT1	Chronic Lymphocytic Leukemia
NEAT1	Colorectal Cancer
NEAT1	Esophageal Squamous Cell Carcinoma
NEAT1	Glioma
NEAT1	Hepatocellular Carcinoma
NEAT1	Laryngeal Squamous Cell Carcinoma
NEAT1	Nasopharyngeal Carcinoma
NEAT1	Non-Small Cell Lung Cancer
NEAT1	Oral Squamous Cell Carcinoma
NEAT1	Ovarian Cancer
NEAT1	Papillary Thyroid Carcinoma
NEAT1	Prostate Cancer
NKILA	Breast Cancer
NLC1-C	Testicular Embryonal Carcinoma
NONHSAT012762	Triple-Negative Breast Cancer
NONHSAT037832	Papillary Thyroid Carcinoma
NONHSAT125629	Triple-Negative Breast Cancer
NR_002809	Astrocytoma
NR_003225.2	Papillary Thyroid Carcinoma
NR_003584	Malignant Pleural Mesothelioma
NR_003586	Gastric Cardia Adenocarcinoma
NR_015378	Hepatocellular Carcinoma
NR_015430	Gastric Cardia Adenocarcinoma
NR_015441	Colorectal Cancer
NR_024256	Renal Cell Carcinoma
NR_024284	Hepatocellular Carcinoma
NR_024418	Clear Cell Renal Cell Carcinoma
NR_026591	Hepatocellular Carcinoma
NR_026860	Renal Cell Carcinoma
NR_027151	Hepatocellular Carcinoma
NR_027775	Gastric Cardia Adenocarcinoma
NR_033374	Colorectal Cancer
NR_033449	Gastric Cardia Adenocarcinoma
NR_033663	Gastric Cardia Adenocarcinoma
NR_034174	Lung Adenocarcinoma
NR_038125	Lung Adenocarcinoma
NR_038990	Colorectal Cancer
NR_047562	Lung Adenocarcinoma
NR_073085	Papillary Thyroid Carcinoma
NRG1	Lung Cancer
ODRUL	Osteosarcoma
OVAL	Ovarian Cancer
P14695	Hepatocellular Carcinoma
P15INK4B	Ovarian Cancer
P16984	Hepatocellular Carcinoma
P19780	Hepatocellular Carcinoma
P23099	Hepatocellular Carcinoma
P24363	Hepatocellular Carcinoma
P28210	Hepatocellular Carcinoma
P33863	Hepatocellular Carcinoma
P4091	Hepatocellular Carcinoma
P6391	Hepatocellular Carcinoma
P6488	Hepatocellular Carcinoma
P700	Hepatocellular Carcinoma
P8611	Hepatocellular Carcinoma
P8725	Hepatocellular Carcinoma
P8860	Hepatocellular Carcinoma
P9745	Hepatocellular Carcinoma
PANDAR	Bladder Cancer
PANDAR	Breast Cancer
PANDAR	Hepatocellular Carcinoma
PANDAR	Non-Small Cell Lung Cancer
PAUPAR	Melanoma
PCAN-1	Breast Cancer
PCAN-2	Breast Cancer
PCAN-3	Breast Cancer
PCAN-4	Breast Cancer
PCAN-6	Breast Cancer
PCAN-R1	Non-Small Cell Lung Cancer
PCAN-R1	Prostate Cancer
PCAN-R2	Prostate Cancer
PCAT-1	Bladder Cancer
PCAT-1	Colorectal Cancer
PCAT-1	Esophageal Squamous Cell Carcinoma
PCAT-1	Prostate Cancer
PCAT18	Prostate Cancer
PCAT29	Prostate Cancer
PCAT5	Prostate Cancer
PCGEM1	Prostate Cancer
PCNA-AS1	Hepatocellular Carcinoma
PCOTH	Prostate Cancer
PEG10	Diffuse Large B-Cell Lymphoma
PEG10	Esophageal Cancer
PFKFB1	Hepatocellular Carcinoma
PICSAR	Cutaneous Squamous Cell Carcinoma
PINT	Colorectal Cancer
PlncRNA-1	Esophageal Squamous Cell Carcinoma
PlncRNA-1	Prostate Cancer
POU5F1P1	Prostate Cancer
POU6F2-AS2	Esophageal Squamous Cell Carcinoma
PRAL	Hepatocellular Carcinoma
PRAS	Colon Cancer
PRINS	Prostate Cancer
PRNCR1	Colorectal Cancer
PRNCR1	Gastric Cancer
PRNCR1	Prostate Cancer
PRSS21	Gastric Cancer
PTCSC2	Papillary Thyroid Carcinoma
PTCSC3	Thyroid Cancer
PTENP1	Gastric Cancer
PTENP1	Hepatocellular Carcinoma
PVT1	Bladder Cancer
PVT1	Cervical Cancer
PVT1	Colorectal Cancer
PVT1	Malignant Pleural Mesothelioma
PVT1	Multiple Myeloma
PVT1	Non-Small Cell Lung Cancer
PVT1	Pancreatic Cancer
PVT1	Pancreatic Ductal Adenocarcinoma
PVT1	Prostate Cancer
PVT1	Thyroid Cancer
R05532	Colorectal Cancer
RCCRT1	Renal Cell Carcinoma
RGMB-AS1	Lung Adenocarcinoma
RGMB-AS1	Non-Small Cell Lung Cancer
RMEL3	Melanoma
RMRP	Gastric Cancer
ROPNR	Acute Myeloid Leukemia
RP11-119F7.4	Gastric Cancer
RP11-160H22.5	Hepatocellular Carcinoma
RP11-169D4.1-001	Laryngeal Squamous Cell Carcinoma
RP11-1C1.7	Lung Adenocarcinoma
RP11-304L19.5	Hepatocellular Carcinoma
RP11-325I22.2	Lung Adenocarcinoma
RP11-385J1.2	Non-Small Cell Lung Cancer
RP11-397D12.4	Non-Small Cell Lung Cancer
RP11-401P9.4	Hepatocellular Carcinoma
RP11-445H22.4	Breast Cancer
RP11-445K13.2	Lung Adenocarcinoma
RP11-473M20.11	Lung Adenocarcinoma
RP11-501G6.1	Hepatocellular Carcinoma
RP11-528G1.2	Gastric Cancer
RP11-58D2.1	Pancreatic Cancer
RP11-643M14.1	Gastric Cancer
RP11-672F9.1	Hepatocellular Carcinoma
RP11-789C1.1	Gastric Cancer
RP11-893F2.6	Lung Adenocarcinoma
RP11-909N17.3	Lung Adenocarcinoma
RP11-909N17.3	Non-Small Cell Lung Cancer
RP1-317E23.3	Non-Small Cell Lung Cancer
RP13-514E23.1	Lung Adenocarcinoma
RP1-90D4.3	Lung Adenocarcinoma
RP3-508I15.14	Non-Small Cell Lung Cancer
RP4-575N6.5	Lung Adenocarcinoma
RP4-583P15.10	Breast Cancer
RP5-1014O16.1	Hepatocellular Carcinoma
RP5-826L7.1	Lung Adenocarcinoma
RPL34-AS1	Colorectal Cancer
RPL34-AS1	Gastric Cancer
RPLP0P2	Lung Adenocarcinoma
RRP1B	Laryngeal Squamous Cell Carcinoma
SBF2-AS1	Non-Small Cell Lung Cancer
SCAL1	Lung Cancer
SChLAP1	Bladder Cancer
SIRT1-AS	Hepatocellular Carcinoma
SKP2	Non-Small Cell Lung Cancer
SLC25A27	Hepatocellular Carcinoma
SLC7A6	Hepatocellular Carcinoma
SLNCR1	Melanoma
snaR	Colon Cancer
SNHG1	Hepatocellular Carcinoma
SNHG1	Non-Small Cell Lung Cancer
SNHG15	Gastric Cancer
SNHG15	Hepatocellular Carcinoma
SNHG20	Hepatocellular Carcinoma
SNHG3	Hepatocellular Carcinoma
SNHG5	Gastric Cancer
SOCS2-AS1	Prostate Cancer
SOX2OT	Breast Cancer
SOX2OT	Esophageal Squamous Cell Carcinoma
SOX2OT	Hepatocellular Carcinoma
SOX2OT	Lung Squamous Cell Carcinoma
SOX2OT-S1	Esophageal Squamous Cell Carcinoma
SOX2OT-S2	Esophageal Squamous Cell Carcinoma
SPRY4-IT1	Bladder Cancer
SPRY4-IT1	Breast Cancer
SPRY4-IT1	Clear Cell Renal Cell Carcinoma
SPRY4-IT1	Esophageal Squamous Cell Carcinoma
SPRY4-IT1	Glioma
SPRY4-IT1	Hepatocellular Carcinoma
SRA1	Laryngeal Squamous Cell Carcinoma
SRHC	Hepatocellular Carcinoma
ST7OT1	Glioma
T-ALL-R-LncR1	Acute Lymphoblastic Leukemia
TATDN1	Non-Small Cell Lung Cancer
TC0100223	Epithelial Ovarian Cancer
TC0101441	Epithelial Ovarian Cancer
TC0101686	Epithelial Ovarian Cancer
TC1500845	Ovarian Cancer
TCF7	Hepatocellular Carcinoma
TCL6	Acute T-Lymphocytic Leukemia
TCONS_00010232	Cervical Cancer
TCONS_00014512	Hepatoblastoma
TCONS_00014978	Hepatoblastoma
TCONS_00018278	Hepatocellular Carcinoma
TCONS_00024647	Hepatoblastoma
TCONS_00026506	Colorectal Cancer
TCONS_00090092_MEG3	Hepatoblastoma
TCONS_l2_00000179	Hepatoblastoma
TCONS_l2_00003938	Triple-Negative Breast Cancer
TCONS_l2_00004424	Hepatoblastoma
TCONS_l2_00006843	Hepatoblastoma
TCONS_l2_00010365	Papillary Thyroid Carcinoma
TCONS_l2_00014091	Hepatoblastoma
TCONS_l2_00018070	Hepatoblastoma
TCONS_l2_00018071	Hepatoblastoma
TCONS_l2_00020565	Hepatoblastoma
TCONS_l2_00021262	Hepatoblastoma
TCONS_l2_00030560	Hepatoblastoma
THBS4-003	Prostate Cancer
TI09485	Cervical Cancer
TI10124	Cervical Cancer
TI13831	Cervical Cancer
TI18318	Cervical Cancer
TI21327	Cervical Cancer
TI22687	Cervical Cancer
TNXA	Bladder Cancer
TP53TG1	Non-Small Cell Lung Cancer
TP73-AS1	Multiple Myeloma
TP73-AS1	Non-Small Cell Lung Cancer
TRPM2-AS	Prostate Cancer
TSLC1-AS1	Glioma
TSNAX-DISC1	Gastric Cancer
TUBA4B	Non-Small Cell Lung Cancer
TUC339	Hepatocellular Carcinoma
T-UCR	Bladder Cancer
TUG1	Colorectal Cancer
TUG1	Esophageal Squamous Cell Carcinoma
TUG1	Gastric Cancer
TUG1	Glioblastoma
TUG1	Glioma
TUG1	Hepatoblastoma
TUG1	Hepatocellular Carcinoma
TUG1	Multiple Myeloma
TUG1	Osteosarcoma
TUG1	Prostate Cancer
TUG1	Renal Cell Carcinoma
TUG1	Urothelial Carcinoma Of The Bladder
TUSC7	Colorectal Cancer
TUSC7	Esophageal Squamous Cell Carcinoma
TUSC7	Gastric Cancer
TUSC7	Non-Small Cell Lung Cancer
TUSC7	Osteosarcoma
U85044	Osteosarcoma
uc.283-plus	Glioma
uc.338	Hepatocellular Carcinoma
uc.341	Gastric Cancer
uc.388	Colorectal Cancer
uc.73	Colorectal Cancer
uc001aka.2	Renal Cell Carcinoma
uc001gch.1	Lung Adenocarcinoma
uc001gzl.3	Lung Adenocarcinoma
uc001lsz	Gastric Cancer
uc001lsz	Liver Cancer
uc001lsz	Lung Cancer
uc001lsz	Prostate Cancer
uc001ncr	Hepatocellular Carcinoma
uc001vjj.1	Renal Cell Carcinoma
uc002mbe.2	Liver Cancer
uc002nbr.3	Endometrial Carcinoma
uc002pyc	Hepatocellular Carcinoma
uc003bgl.1	Non-Small Cell Lung Cancer
uc003erl.1	Renal Cell Carcinoma
uc003iqu	Gastric Cancer
uc003jfz.2	Gastric Cardia Adenocarcinoma
uc003qef.1	Papillary Thyroid Carcinoma
uc003tab.3	Papillary Thyroid Carcinoma
uc003tfx	Gastric Cancer
uc003xut.	Endometrial Carcinoma
uc003yqb.1	Hepatocellular Carcinoma
uc004bbl.1	Lung Adenocarcinoma
uc004bdv.3	Hepatocellular Carcinoma
uc009wkz.1	Renal Cell Carcinoma
uc021re1.1	Endometrial Carcinoma
UCA1	Acute Myeloid Leukemia
UCA1	Breast Cancer
UCA1	Colorectal Cancer
UCA1	Esophageal Squamous Cell Carcinoma
UCA1	Liver Cancer
UCA1	Lung Cancer
UCA1	Melanoma
UCA1	Non-Small Cell Lung Cancer
UCA1	Osteosarcoma
UCA1	Ovarian Cancer
UCA1	Prostate Cancer
UCA1	Renal Cell Carcinoma
UCA1	Tongue Squamous Cell Carcinoma
ucoo2kmd.1	Colorectal Cancer
UFC1	Hepatocellular Carcinoma
ULK4P2	Hepatocellular Carcinoma
URHC	Hepatocellular Carcinoma
WRAP53	Hepatocellular Carcinoma
WT1-AS	Gastric Cancer
WT1-AS	Hepatocellular Carcinoma
WT1-AS	Wilms Tumor
X91348	Clear Cell Renal Cell Carcinoma
XIST	Colorectal Cancer
XIST	Glioblastoma
XIST	Hepatocellular Carcinoma
XIST	Non-Small Cell Lung Cancer
XIST	Ovarian Cancer
XIST	Renal Collecting Duct Carcinoma
XIST	Testicular Germ Cell Tumor
XLOC_000303	Colorectal Cancer
XLOC_000371	Non-Small Cell Lung Cancer
XLOC_003286	Lung Adenocarcinoma
XLOC_003405	Lung Adenocarcinoma
XLOC_005327	Prostate Cancer
XLOC_006844	Colorectal Cancer
XLOC_007697	Prostate Cancer
XLOC_008559	Prostate Cancer
XLOC_009911	Prostate Cancer
XLOC_010235	Gastric Cancer
XLOC_010588	Cervical Cancer
XLOC_010967	Astrocytoma
XLOC_012255	Lung Adenocarcinoma
XLOC_013014	Esophageal Squamous Cell Carcinoma
XLOC_014172	Hepatocellular Carcinoma
XR_250621.1	Triple-Negative Breast Cancer
Z38	Breast Cancer
Z82214.3	Non-Small Cell Lung Cancer
ZEB1-AS1	Esophageal Squamous Cell Carcinoma
ZEB1-AS1	Hepatocellular Carcinoma
ZEB2NAT	Bladder Cancer
ZFAS1	Breast Cancer
ZFAS1	Colorectal Cancer
ZFAS1	Gastric Cancer
ZFAS1	Hepatocellular Carcinoma
ZMAT1	Gastric Cancer
ZNF295-AS1	Lung Adenocarcinoma
ZNRD1-AS1	Lung Cancer
ZXF1	Lung Adenocarcinoma
